# Supplementary material for: Age-Dependent Evolution of the Yeast Protein Interaction Network Suggests a Limited Role of Gene Duplication and Divergence
Source: PLoS Comput Biol. 2008 Nov 28;4(11):e1000232. doi: 10.1371/journal.pcbi.1000232 (PMC2583957; doi:10.1371/journal.pcbi.1000232)

## A mRNA splicing

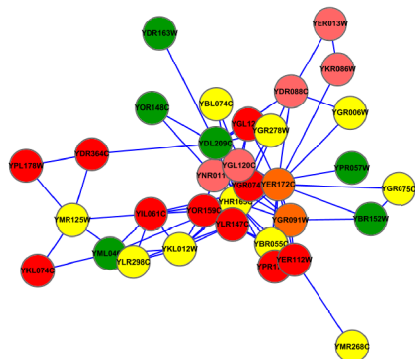

## B Replication Complex

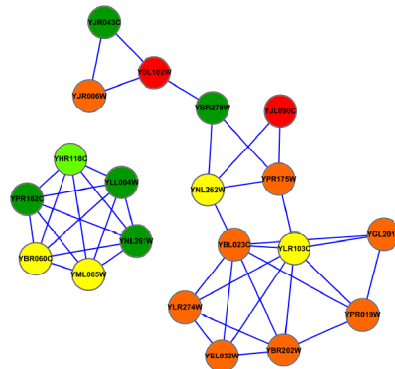

## C RNA polymerase I

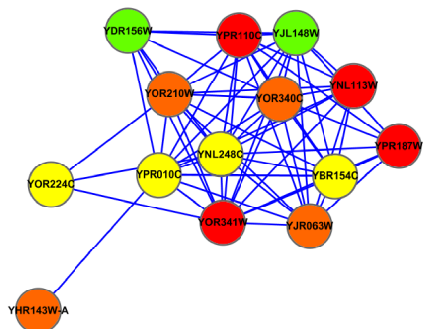

## D RNA polymerase III

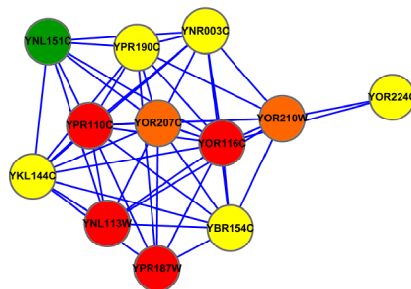

## E Actin-associated Proteins

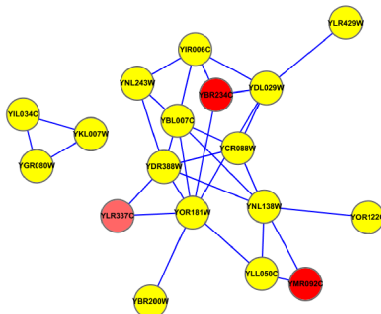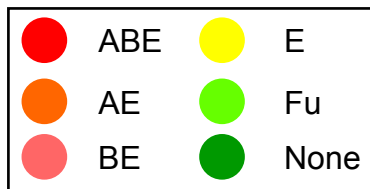

Supplement: Figure S4 — Age-dependent interaction patterns of several MIPS complexes in the LC+HTP set. In mRNA splicing (A) and replication (B) complexes, the subunits of the same age group are more likely to be connected. In RNA polymerase I & III (C and D), most subunits are densely connected to each other, therefore age-dependency is not evident. In the case of actin-associated proteins, most subunits are of the same age group (E), reflecting a relatively recently emerged module. (0.52 MB PDF) [file pcbi.1000232.s008.pdf]
