# Supplementary material for: Age-Dependent Evolution of the Yeast Protein Interaction Network Suggests a Limited Role of Gene Duplication and Divergence
Source: PubMed Central journal article supplement (PMC2583957; doi:10.1371/journal.pcbi.1000232), 2008-11-28

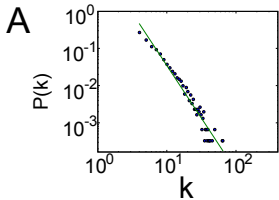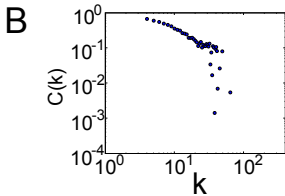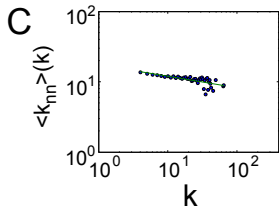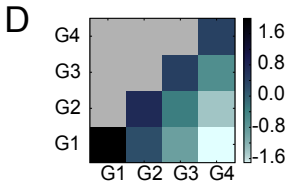

Supplement: pcbi.1000232.s007.pdf [file pcbi.1000232.s007.pdf]
