# Supplementary material for: Age-Dependent Evolution of the Yeast Protein Interaction Network Suggests a Limited Role of Gene Duplication and Divergence
Source: PubMed Central journal article supplement (PMC2583957; doi:10.1371/journal.pcbi.1000232), 2008-11-28
Supplement: pcbi.1000232.s009.pdf [file pcbi.1000232.s009.pdf]

Table S1. The network characteristics of the yeast PPI data

|                                   | LC     |                    | HTP    |        | HTP_LC |        |
|-----------------------------------|--------|--------------------|--------|--------|--------|--------|
|                                   | Total  | <sup>1</sup> Giant | Total  | Giant  | Total  | Giant  |
| Number of nodes                   | 3268   | 3186               | 2488   | 2263   | 3780   | 3721   |
| Number of edges                   | 12058  | 12004              | 6766   | 6617   | 16505  | 16471  |
| <sup>2</sup> $\langle k \rangle$  | 7.4    | 7.5                | 5.4    | 5.8    | 8.7    | 8.8    |
| <sup>3</sup> $\gamma$             | -1.7   | -1.7               | -1.9   | -1.9   | -1.7   | -1.7   |
| Clustering Coefficient (C)        | 0.13   | 0.13               | 0.21   | 0.21   | 0.14   | 0.14   |
| Modularity (Q)                    | 0.62   | 0.62               | 0.69   | 0.68   | 0.55   | 0.55   |
| <sup>4</sup> Triangle density (T) | 1.2    | 1.2                | 1.1    | 1.2    | 1.4    | 1.4    |
| <sup>5</sup> $\delta$             | -0.30  | -0.31              | -0.08  | -0.10  | -0.20  | -0.20  |
| $\Delta D$                        | 0.5458 | 0.5318             | 0.5689 | 0.5495 | 0.5207 | 0.5062 |

<sup>1</sup> The largest connected component  
<sup>2</sup> average degree  
<sup>3</sup> the degree exponent in  $P(k) \sim k^{-\gamma}$   
<sup>4</sup> the number of triangles per edge  
<sup>5</sup> the mixing exponent in  $\langle k_{nn} \rangle(k) \sim k^{-\delta}$
