# Supplementary material for: Age-Dependent Evolution of the Yeast Protein Interaction Network Suggests a Limited Role of Gene Duplication and Divergence
Source: PLoS Comput Biol. 2008 Nov 28;4(11):e1000232. doi: 10.1371/journal.pcbi.1000232 (PMC2583957; doi:10.1371/journal.pcbi.1000232)
Supplement: Table S2 — The network characteristics of the network growth models (0.13 MB PDF) [file pcbi.1000232.s010.pdf]

Table S2. The network characteristics of the network growth models

| Model                              | <sup>1</sup> parameters | <sup>2</sup> <k> | <sup>3</sup> $\gamma$ | Clustering Coefficient (C) | Modularity Index (Q) | <sup>4</sup> Triangle density (T) | <sup>5</sup> $\delta$ | $\Delta D$ |
|------------------------------------|-------------------------|------------------|-----------------------|----------------------------|----------------------|-----------------------------------|-----------------------|------------|
| PA                                 | -                       | 8.0±0.0          | -2.0±0.1              | 0.010±0.0005               | 0.33±0.003           | 0.066±0.005                       | -0.08±0.03            | -0.80±0.03 |
| DD                                 | p=0.05                  | q=0.5            | 7.4±0.8               | -1.9±0.07                  | 0.015±0.002          | 0.62±0.05                         | 0.080±0.01            | -0.27±0.07 |
|                                    |                         | q=0.6            | 3.9±0.2               | -2.2±0.08                  | 0.019±0.003          | 0.79±0.03                         | 0.046±0.007           | -0.26±0.07 |
|                                    |                         | q=0.7            | 2.4±0.08              | -2.6±0.1                   | 0.024±0.004          | 0.88±0.01                         | 0.027±0.004           | -0.27±0.06 |
|                                    |                         | q=0.5            | 7.7±0.9               | -1.9±0.07                  | 0.030±0.004          | 0.62±0.06                         | 0.16±0.02             | -0.20±0.06 |
|                                    | p=0.1                   | q=0.6            | 4.0±0.3               | -2.2±0.08                  | 0.035±0.004          | 0.79±0.04                         | 0.087±0.008           | -0.21±0.07 |
|                                    |                         | q=0.7            | 2.5±0.08              | -2.6±0.1                   | 0.045±0.006          | 0.88±0.01                         | 0.053±0.005           | -0.22±0.06 |
|                                    |                         | q=0.5            | 8.3±0.8               | -1.9±0.06                  | 0.055±0.006          | 0.61±0.05                         | 0.30±0.018            | -0.13±0.05 |
|                                    | p=0.2                   | q=0.6            | 4.3±0.3               | -2.2±0.08                  | 0.070±0.008          | 0.79±0.04                         | 0.17±0.01             | -0.13±0.05 |
|                                    |                         | q=0.7            | 2.7±0.09              | -2.6±0.1                   | 0.085±0.007          | 0.88±0.01                         | 0.099±0.007           | -0.14±0.05 |
|                                    |                         | q=0.6            | 6.1±0.6               | -1.8±0.05                  | 0.035±0.004          | 0.64±0.05                         | 0.24±0.032            | -0.14±0.06 |
| <sup>6</sup> DD <sub>asym</sub>    | p=0.1                   | q=0.6            | 6.1±0.6               | -1.8±0.05                  | 0.035±0.004          | 0.64±0.05                         | 0.24±0.032            | -0.14±0.06 |
| <sup>7</sup> DD <sub>asym-rw</sub> | p=0.1                   | q=0.6            | 8.5±0.5               | -1.8±0.05                  | 0.035±0.002          | 0.44±0.02                         | 0.20±0.026            | 0.08±0.02  |
| AP                                 | -                       | 8.0±0.0          | -3.3±0.2              | 0.007±0.0004               | 0.34±0.004           | 0.018±0.001                       | 0.37±0.02             | 0.47±0.02  |
| CG                                 | Newman                  | 8.0±0.0          | -2.83±0.06            | 0.28±0.007                 | 0.77±0.02            | 1.01±0.03                         | -0.13±0.02            | 0.50±0.10  |
|                                    | TCC                     | 8.0±0.0          | -2.82±0.06            | 0.27±0.006                 | 0.77±0.02            | 1.01±0.02                         | -0.14±0.02            | 0.51±0.16  |

Each model is run 100 times until the number of nodes reaches 3000. The average degree is constant (<k>=8.0) for PA, AP and CG model but is variable in DD model depending on the parameters p and q.

<sup>1</sup> In DD model, p=the connection probability between duplicates, q=the divergence probability. In CG model, the module is defined by the method by Newman or TCC (triangularly connected component).

<sup>2</sup> average degree

<sup>3</sup> the degree exponent in  $P(k) \sim k^{-\gamma}$

<sup>4</sup> the number of triangles per edge

<sup>5</sup> the mixing exponent in  $\langle k_{nn} \rangle(k) \sim k^{-\delta}$

<sup>6</sup> Ispolatov et al. (2005) Phys Rev E Stat Nonlin Soft Matter Phys 71: 061911

<sup>7</sup> Pastor-Satorras et al. (2003) J Theor Biol 222: 199-210. (simulated using the equation 17)
